# Supplementary material for: Dynamic Phosphorylation of miRNA Biogenesis Factor HYL1 by MPK3 Involving Nuclear–Cytoplasmic Shuttling and Protein Stability in Arabidopsis
Source: MDPI journal article supplement (doi:10.3390/ijms23073787), 2022-03-30
Supplement: s1 [file s1]

## Supplementary Information

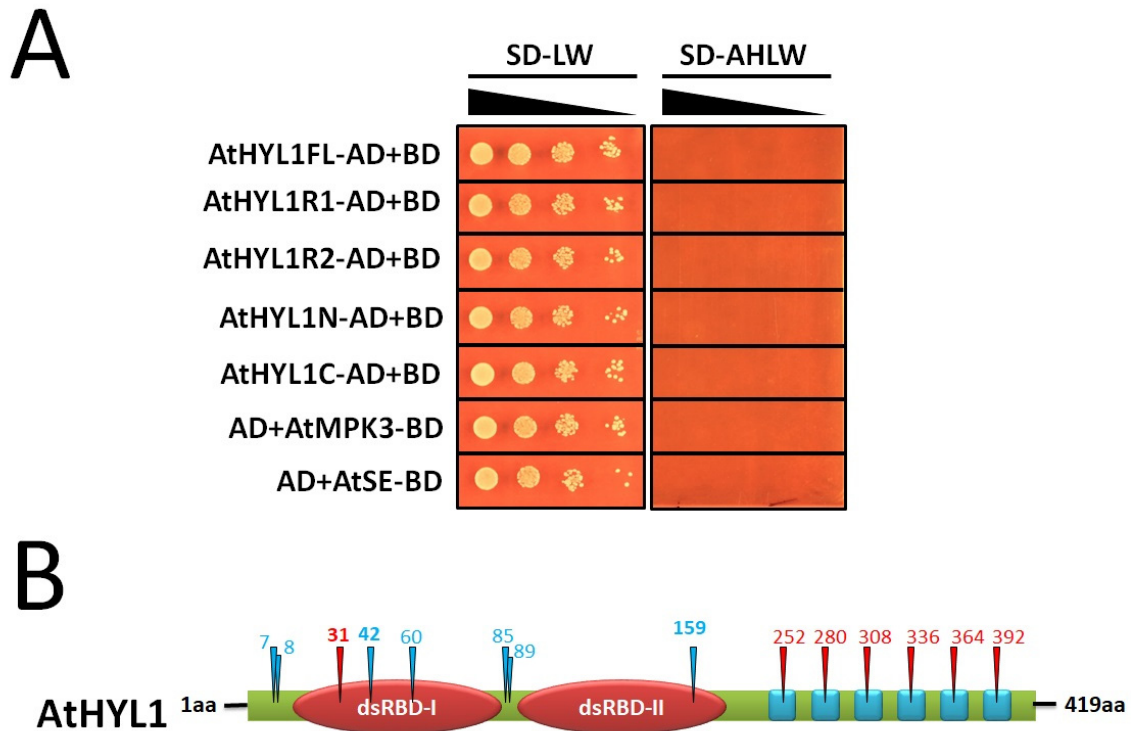

**Figure S1. Controls of Y2H assay** (Related to Figure 1.) **(A)** Protein-protein interaction using empty vectors with AtHYL1 and its variants along with AtMPK3 and AtSE in SD-LW and SD-AHLW plates. **(B)** Distribution of putative phosphorylation sites in AtHYL1 as detected by NetPhos. Blue and red arrow head represents the potential serine and threonine phosphorylation residues.



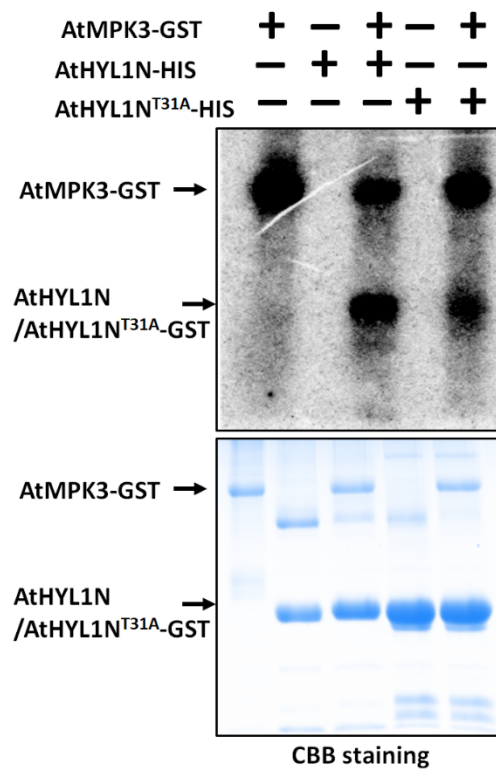

**Figure S3.** *In-vitro* phosphorylation assay using a bacterially purified AtHYL1N wild type and AtHYL1N<sup>T31A</sup> by AtMPK3. The canonical evolutionarily conserved threonine-31 was mutated to alanine, a non-phosphorytable amino acid.

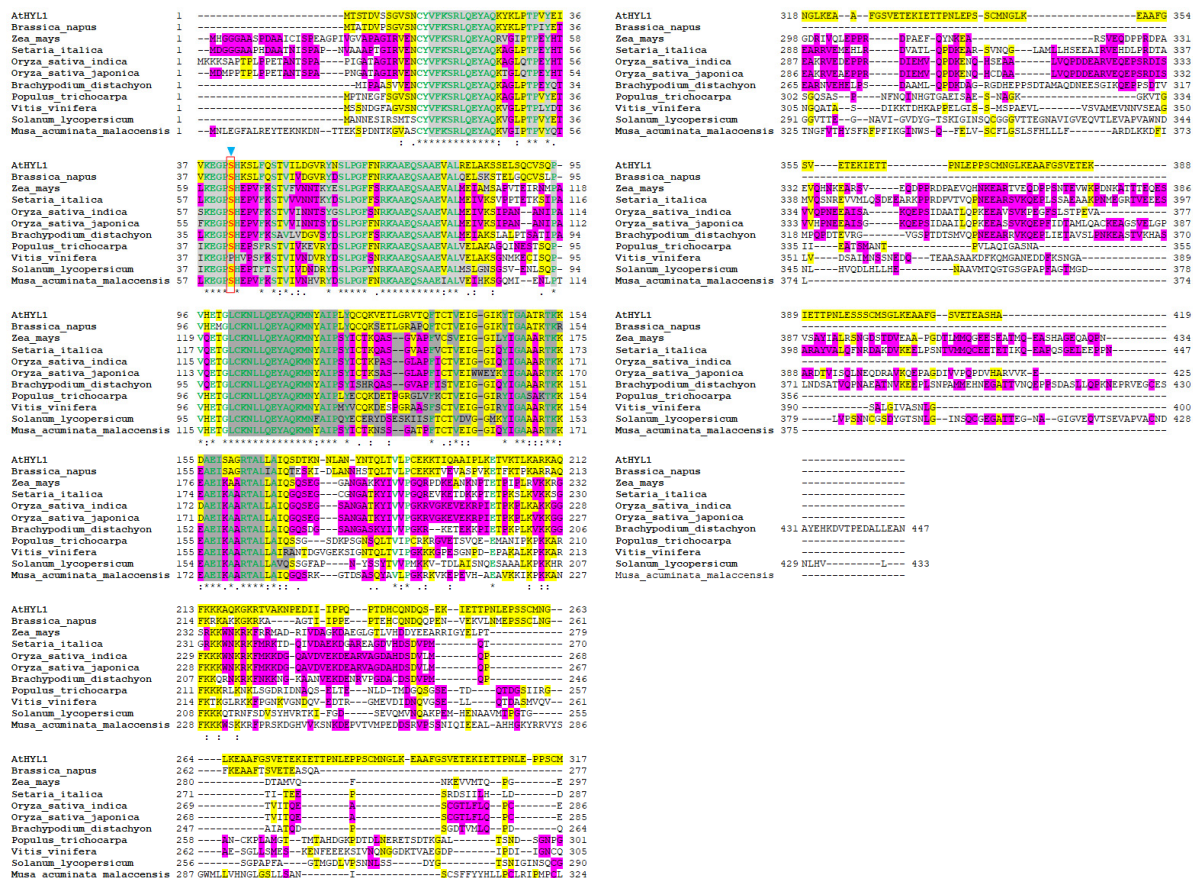

**Figure S4.** Multiple protein sequence alignment showing the evolutionarily conservation of serine-42 of AtHYL1 in other plant species indicated by blue arrow head within red box.

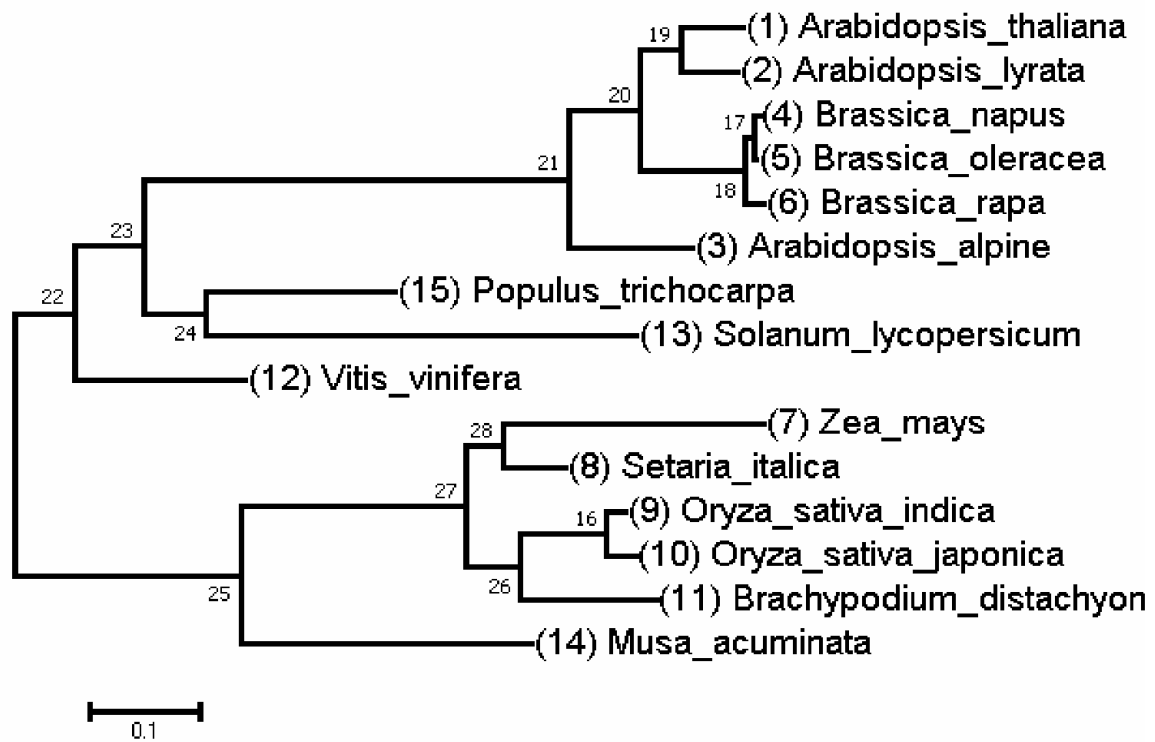

**Figure S5.** Phylogenetic tree showing the relation of AtHYL1 with its homologue proteins in other plants.



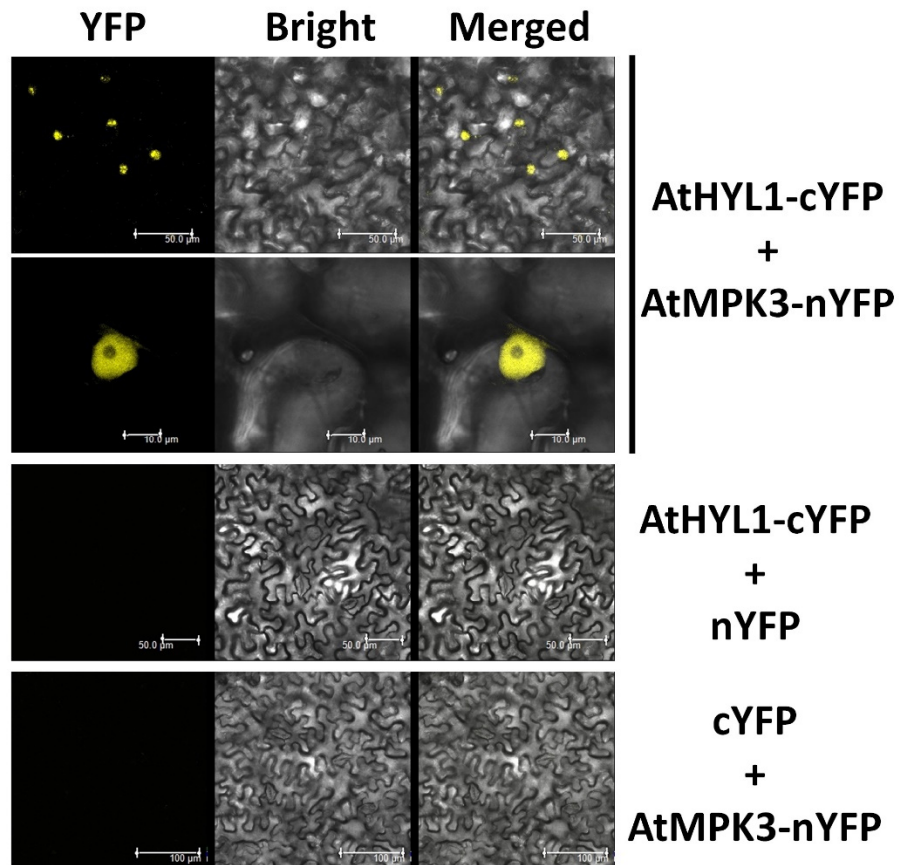

**Figure S7.** BiFC assay showing the interaction between AtHYL1-cYFP and AtMPK3-nYFP in *N. benthamiana* leaves under confocal microscope.

# AtHYL1-cYFP + AtHYL1-nYFP

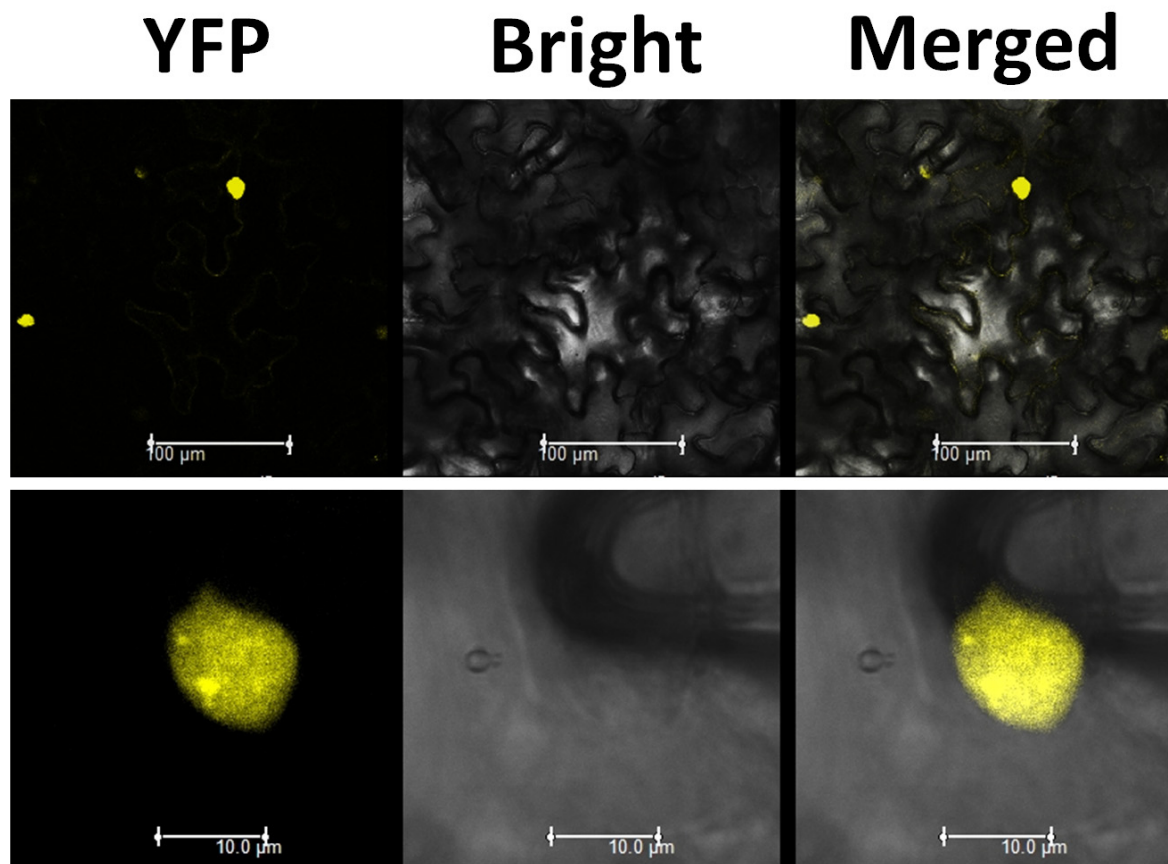

**Figure S8.** BiFC assay showing the interaction between AtHYL1-cYFP and AtHYL1-nYFP in *N. benthamiana* leaves under confocal microscope.

**Table S1: Putative phosphorylation sites on AtHYL1.** Phosphorylation -sites of AtHYL1 protein were predicted by the program of NetPhos 2.0 server (<http://www.cbs.dtu.dk/services/NetPhos-2.0/>). All possible threonine and serine sites of phosphorylation are given. Yellow highlighted are the putative MAP kinase phosphorylation sites.

| No               | Position | Group             | score |
|------------------|----------|-------------------|-------|
| <b>Threonine</b> |          |                   |       |
| 1                | 2        | ---MTSTDV         | 0.631 |
| 2                | 31       | YKLPTPVYE         | 0.313 |
| 3                | 152      | AATR <b>TKKDA</b> | 0.936 |
| 4                | 205      | ETV <b>KTLKAR</b> | 0.818 |
| 5                | 252      | KIETTPNLE         | 0.845 |
| 6                | 274      | GSVET <b>EKIE</b> | 0.851 |
| 7                | 280      | KIETTPNLE         | 0.845 |
| 8                | 302      | GSVET <b>EKIE</b> | 0.851 |
| 9                | 308      | KIETTPNLE         | 0.845 |
| 10               | 330      | GSVET <b>EKIE</b> | 0.851 |
| 11               | 336      | KIETTPNLE         | 0.845 |
| 12               | 358      | GSVET <b>EKIE</b> | 0.851 |
| 13               | 364      | KIETTPNLE         | 0.845 |
| 14               | 386      | GSVET <b>EKIE</b> | 0.851 |
| 15               | 392      | KIETTPNLE         | 0.845 |
| <b>Serine</b>    |          |                   |       |
| 1                | 7        | STDVSSGVS         | 0.629 |
| 2                | 8        | TDVSSGVS <b>N</b> | 0.808 |
| 3                | 42       | KEGP <b>SHKSL</b> | 0.987 |
| 4                | 60       | VRYN <b>SLPGF</b> | 0.729 |
| 5                | 85       | ELAK <b>SSELS</b> | 0.973 |
| 6                | 89       | SSEL <b>SQCVS</b> | 0.815 |
| 7                | 159      | DAEISAGRT         | 0.897 |

**Table S2: List of primers used in the present study**

| SN | Gene          | Sequence                                                                                                | Use                                                   |
|----|---------------|---------------------------------------------------------------------------------------------------------|-------------------------------------------------------|
| 1  | AtMPK3        | For: ATCCGGAATTCATGAACACCGGCGGTGG<br>Rev: ATCGCGGATCCCCTAACCGTATGTTGGATTGAGTGC                          | Y2H                                                   |
| 2  | AtHYL1/DRB1   | For: CGGGAATTCATGACCTCCACTGATGTTTC<br>Rev: CCGCTCGAGTGCGTGGCTTGCTTC                                     | Protein Expression for in-vitro phosphorylation assay |
|    | AtHYL1-N      | For: CGCGGATCCGCATGACCTCCACTGATGTTTC<br>Rev: ATCCGCTCGAGTGACTGGATCGCTAAAAGAG                            |                                                       |
|    | AtHYL1-C      | For: CGCGGATCCGCGACACTAAAAACAACCTTG<br>Rev: GTCCGGAATTCTTATGCGTGGCTTGCTTCTGTCTCC                        |                                                       |
|    | AtHYL1-N      | For: GAATTCATGACCTCCACTGATGTTTC<br>Rev: CTCGAGAGGAAGTACAGTAAGCTGAGTG                                    | Protein expression                                    |
|    | AtHYL1-RDM-I  | For: CTGCATATGACCTCCACTGATGTTTC<br>CGGGAATTCATGACCTCCACTGATGTTTC<br>Rev: CGGGAATTCTTGTGAAACACATTGGCTTAG | Y2H                                                   |
|    | AtHYL1-RDM-II | For: CTGCATATGTTACGAAACGGGATTATGC<br>Rev: CGGGAATTCAGGAAGTACAGTAAGCTGAGTG                               |                                                       |
|    | AtHYL1-C      | For: CTGCATATG TGTGAGAAGAAGACAATACAG<br>Rev: CGGGAATTC GACACTGTTATGCGTGGCTTG                            |                                                       |
| 3  | AtSE          | For: ATCCGGAATTCATGGCCGATGTTAATCTTCCTCC<br>Rev: ATCGCGGATCCCCTACAAGCTCCTGTAATCAATAACGG                  |                                                       |
| 4  | OsMPK3        | For: GGATCCATGGGGATGGACGGGGCGCCGGTG<br>Rev: CGGAATTCGCTAGTACCGGATGTTTGGGTTTCATCTCGAT                    | Protein expression                                    |
| 5  | OsDRB1-1      | For: ATCGCGGATCCATGAAGAAAAAAGTGCTCCC<br>Rev: GTCCGGAATTCTCAGGCTACCTCAGGTGTTG                            | Protein expression                                    |
|    | OsDRB1-1-N    | For: CGCGGATCCGCATGAAGAAAAAAGTGCTC<br>Rev: ATCCGCTCGAGACCTTGGATTGCCAGAAGAG                              |                                                       |
|    | OsDRB1-1-C    | For: CGCGGATCCGCAATCAGAGGGTTCTGCAAATG<br>Rev: GTCCGGAATTCTCAGGCTACCTCAGGTGTTG                           |                                                       |
| 6  | OsDRB1-2      | For: CGCGGATCCGCATGGACATGCCGCCCAC<br>Rev: CCGCTCGAGTTCTTCGCTCATATTAGT                                   |                                                       |
|    | OsDRB1-2-N    | For: CGCGGATCCGCATGGACATGCCGCCCAC<br>Rev: ATCCGCTCGAGACCTTGGATTGCCAGAAGAG                               |                                                       |
|    | OsDRB1-2-C    | For: CGCGGATCCGCAATCAGAGGGTTCTGCAAATG<br>Rev: CCGCTCGAGTTCTTCGCTCATATTAGT                               |                                                       |
| 7  | OsDRB1-4      | For: CGCGGATCCGCATGGCGGCCGCCACCGCC<br>Rev: CCGCTCGAGCTGTGCAACTCTTTCTTC                                  |                                                       |
|    | OsDRB1-4-N    | For: CGCGGATCCGCATGGCGGCCGCCACCGCC<br>Rev: ATCCGCTCGAGAGCTAAAAGTGAAGTACCG                               |                                                       |
|    | OsDRB1-4-C    | For: CGCGGATCCGCACAAATTACACTTCCATG<br>Rev: CCGCTCGAGCTGTGCAACTCTTTCTTC                                  |                                                       |
| 8  | AtHYL1        | For: CACCATGACCTCCACTGATGTTTC                                                                           | Gateway                                               |

|  |  |                        |                     |
|--|--|------------------------|---------------------|
|  |  | Rev: TGCGTGGCTTGCTTCTG | Cloning<br>in pENTR |
|--|--|------------------------|---------------------|
